# Supplementary material
Source: MDPI journal article supplement (https://www.mdpi.com/2673-7078/1/3/27)
Supplement: s1 [file s1]

## Supplementary Materials

**Table S1.** Minimal, maximal, and mean values of displacement of the sacroiliac joint and the pubic symphysis in mm.

| Direction of displacement | Sacroiliac joint   |                    |                                                  | Pubic symphysis     |                    |                                                  |
|---------------------------|--------------------|--------------------|--------------------------------------------------|---------------------|--------------------|--------------------------------------------------|
|                           | Healthy pelvis     | Symphyseal plating | Symphyseal plating and iliosacral screw fixation | Healthy pelvis      | Symphyseal plating | Symphyseal plating and iliosacral screw fixation |
| Medio-lateral             | -0.04/0.09/0.07    | -0.2/0.14/-0.03    | -0.12/0.26/0.07                                  | -0.005/0-031/0.0135 | 0.19/0.51/0.35     | 0.04/0.29/0.165                                  |
| Cranio-caudal             | 0.07/0.71/0.39     | -0.13/0.37/0.12    | -0.18/0.19/0.005                                 | 1.3/1.58/1.44       | 0.24/0.42/0.33     | 0.05/0.16/0.105                                  |
| Anterio-posterior         | -0.45/-0.02/-0.235 | -0.24/0.085/0.078  | -0.06/0.12/0.03                                  | 0.96/1.14/1.05      | 0.31/0.42/0.365    | 0.31/0.37/0.34                                   |

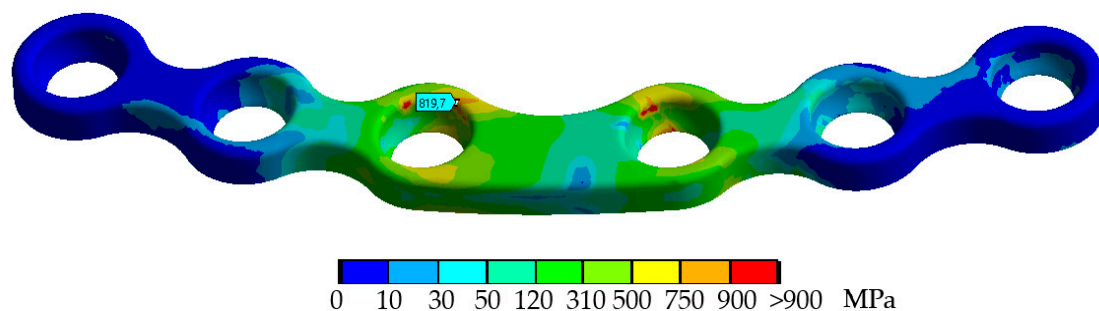

**Figure S1.** Von Mises stresses acting in the symphyseal plate.
